# Supplementary material
Source: HighWire-hosted journal article supplement (https://www.annfammed.org/highwire/filestream/8956/field_highwire_adjunct_files/0/Talamantes_Supp_Table.pdf)
Supplement: Talamantes_Supp_Table.pdf [file Talamantes_Supp_Table.pdf]

## **SUPPLEMENTAL MATERIALS FOR**

Talamantes E, Jerant A, Henderson MC, et al. Community college pathways to medical school and family medicine residency training. *Ann Fam Med.* 2018;16:302-307.

## SUPPLEMENTAL TABLE

| <b>Table 1. Adjusted Odds of Training in Family Medicine Residency Among US MD-granting Medical School Graduates 2010 to 2012</b> |                                |                            |
|-----------------------------------------------------------------------------------------------------------------------------------|--------------------------------|----------------------------|
| <b>Characteristic</b>                                                                                                             | <b>Odds Ratio<br/>(95% CI)</b> | <b>P-value<sup>1</sup></b> |
| College Pathway                                                                                                                   |                                |                            |
| Non-Community College                                                                                                             | Reference                      | -                          |
| High School-Community College                                                                                                     | 1.47 (1.33-1.63)               | <0.001                     |
| Community College-Transfer                                                                                                        | 1.27 (1.06-1.52)               | 0.009                      |
| Post Baccalaureate -Community College                                                                                             | 1.17 (1.06-1.29)               | 0.002                      |
| Age in Years                                                                                                                      | 1.09 (1.08-1.11)               | <0.001                     |
| Gender                                                                                                                            |                                |                            |
| Male                                                                                                                              | Reference                      | -                          |
| Female                                                                                                                            | 1.71 (1.59-1.83)               | <0.001                     |
| Race-ethnicity                                                                                                                    |                                |                            |
| White                                                                                                                             | Reference                      | -                          |
| Black                                                                                                                             | 1.28 (1.13-1.46)               | <0.001                     |
| Latino or Hispanic                                                                                                                | 1.08 (0.94-1.24)               | 0.260                      |
| Asian                                                                                                                             | 0.58 (0.53-0.64)               | <0.001                     |
| Years in Medical School                                                                                                           | 1.14 (1.09-1.19)               | <0.001                     |
| Parental Education                                                                                                                |                                |                            |
| College education                                                                                                                 | Reference                      | -                          |
| Less than college education                                                                                                       | 1.49 (1.35-1.64)               | <0.001                     |
| U.S. High School Region                                                                                                           |                                |                            |
| West                                                                                                                              | Reference                      | -                          |
| Midwest                                                                                                                           | 1.07 (0.97-1.18)               | 0.180                      |
| Northeast                                                                                                                         | 0.60 (0.53-0.67)               | <0.001                     |
| South                                                                                                                             | 0.85 (0.77-0.94)               | 0.001                      |

Notes:

<sup>1</sup> P-value obtained using Wald tests

Non- Community College: Medical graduates who never attended a community college

High School- Community College: Medical graduates who attended a Community College while in high school and prior to graduating from high school

Community College -Transfer: Medical graduates who attended a community college after graduating from high school and prior to transferring to a 4-year university

Post Baccalaureate - Community College: Medical graduates who attended a community college after graduating from a 4-year university

CI: Confidence Intervals
